# Supplementary material for: Stereocomplexation of enantiomeric star-shaped poly(lactide)s with a chromophore core
Source: Royal Society of Chemistry journal article supplement (doi:10.1039/d1ce00037c), 2021-01-01
Supplement: d1ce00037c1.pdf [file d1ce00037c1.pdf]

## Supporting Information

### Stereocomplexation of Enantiomeric Star-Shaped Poly(lactide)s with a Chromophore Core

N.M. Praveena<sup>1, †, ‡</sup>, Selvaraj Nagarajan<sup>1, †, §</sup>, and E. Bhoje Gowd<sup>\*, †, ‡</sup>

<sup>†</sup>Materials Science and Technology Division,  
CSIR-National Institute for Interdisciplinary Science and Technology, Trivandrum 695 019,  
Kerala, India.

<sup>‡</sup>Academy of Scientific and Innovative Research (AcSIR), Ghaziabad 201 002, India.

<sup>§</sup>Department of Chemical Engineering, National Cheng Kung University, Tainan, 701,  
Taiwan.

#### Table of contents

**Figure S1** - <sup>1</sup>H-NMR spectrum of SSPDLA

**Figure S2** - <sup>1</sup>H-NMR spectrum of SSPLLA

**Figure S3** - <sup>1</sup>H-NMR spectrum of SSPDLA after cooling to room temperature from 240 °C at 10 °C/min.

**Figure S4** - GPC traces of SSPDLA (a) as synthesized polymer, (b) heated to 240 °C and cooled to RT at 10 °C/min and (c) heated to 240 °C and cooled to RT at 50 °C/min.

**Figure S5** - CD spectra of melt-cooled SSPDLA from  $T_{\max} = 240$  °C at (a) 10 °C/min and (b) 50 °C/min.

SSPLLA and SSPDLA were obtained by ring-opening polymerization of L-lactide and D-lactide, respectively, under identical conditions using dipyrindamole as the macroinitiator and tin(II)ethylhexanoate (Sn(Oct)<sub>2</sub>) as the catalyst. The structure of SSPLLA and SSPDLA was

confirmed by  $^1\text{H}$  NMR ( $\text{CDCl}_3$  solvent) using a Bruker NMR spectrometer operating at 500 MHz. The chemical shifts were recorded in units of parts per million (ppm).

$^1\text{H}$  NMR spectrum of the star-shaped PDLA and star-shaped PLLA with dipyrindamole as core molecule are presented in Figure S1 and Figure S2, respectively.

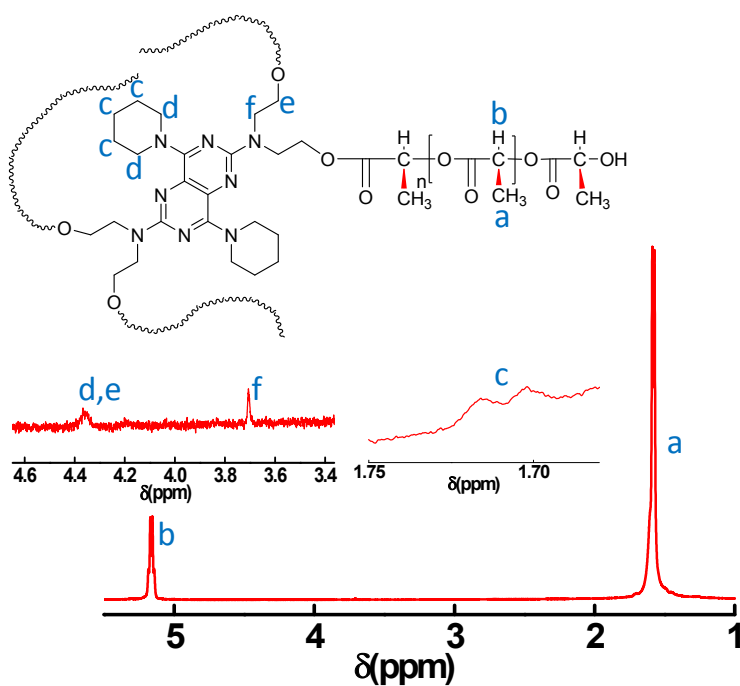

**Figure S1.**  $^1\text{H}$ -NMR spectrum of SSPDLA

( $^1\text{H}$ -NMR spectrum of SSPDLA: 1.57 (d,  $\text{CH}_3$ ), 1.7 (s,  $\text{CH}_2$ ), 5.2 (q, CH), 4.3 (q,  $\text{CH}_2$ ), 3.7 (s,  $\text{CH}_2$ ))

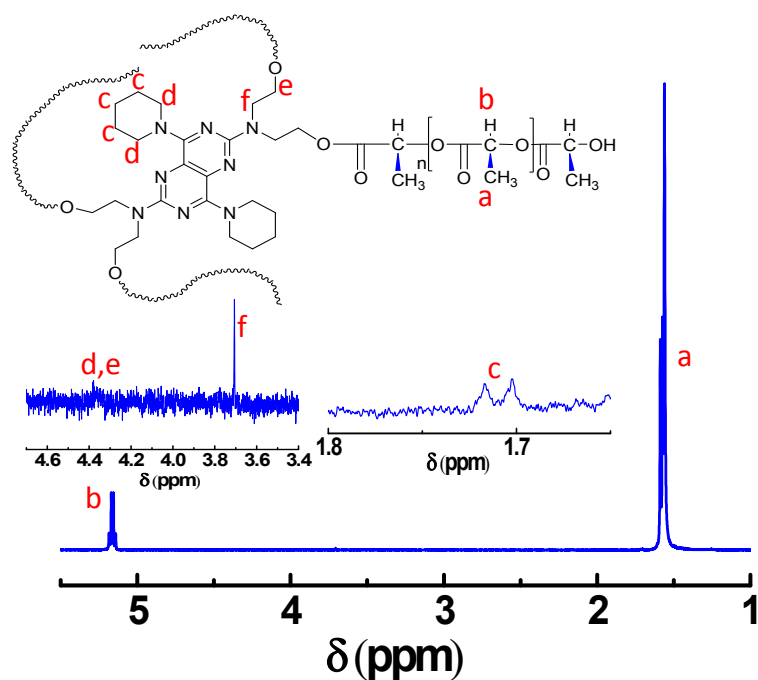

**Figure S2.**  $^1\text{H-NMR}$  spectrum of SSPLLA

( $^1\text{H-NMR}$  spectrum of SSPLLA: 1.57 (d,  $\text{CH}_3$ ), 1.7 (s,  $\text{CH}_2$ ), 5.2 (q, CH), 4.3 (q,  $\text{CH}_2$ ), 3.7 (s,  $\text{CH}_2$ ))

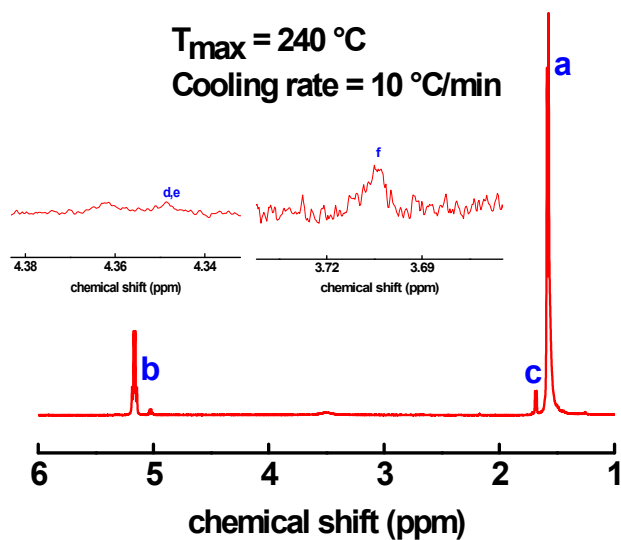

**Figure S3.**  $^1\text{H-NMR}$  spectrum of SSPDLA after cooling to room temperature from 240  $^\circ\text{C}$  at 10  $^\circ\text{C}/\text{min}$ .

( $^1\text{H-NMR}$  spectrum of SSPDLA: 1.57 (d,  $\text{CH}_3$ ), 1.7 (s,  $\text{CH}_2$ ), 5.2 (q, CH), 4.3 (q,  $\text{CH}_2$ ), 3.7 (s,  $\text{CH}_2$ ))

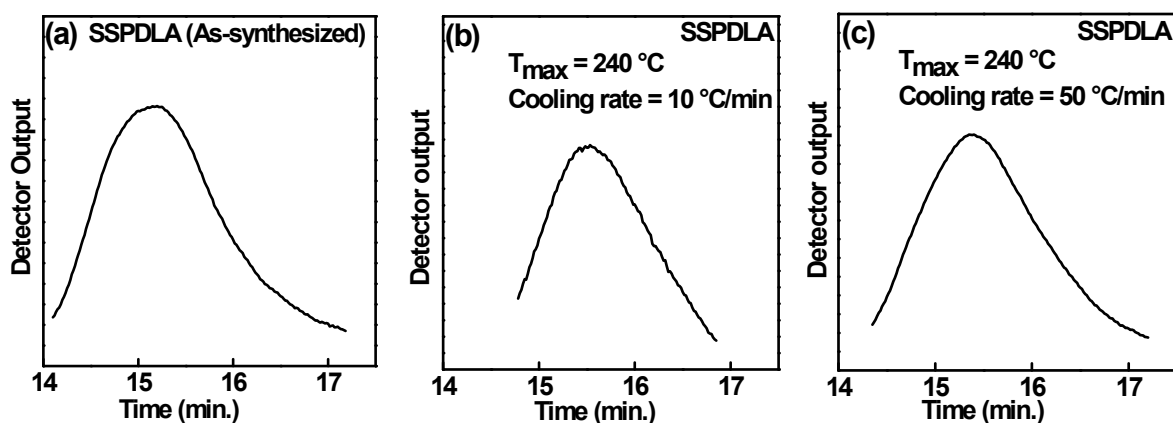

**Figure S4.** GPC traces of SSPDLA (a) as synthesized polymer, (b) heated to 240 °C and cooled to RT at 10 °C/min and (c) heated to 240 °C and cooled to RT at 50 °C/min.

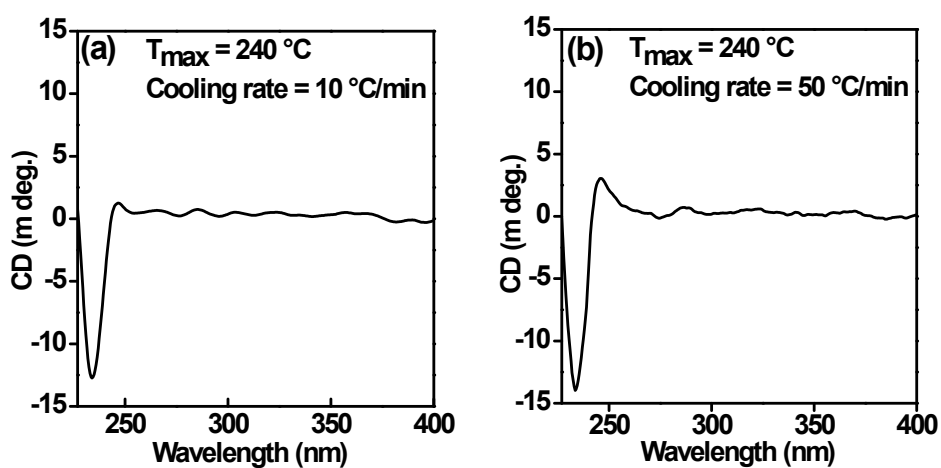

**Figure S5.** CD spectra of melt-cooled SSPDLA from  $T_{\text{max}} = 240$  °C at (a) 10 °C/min and (b) 50 °C/min.
